# Supplementary material for: Co-occurrence of chronic pain and anxiety/depression symptoms in U.S. adults: prevalence, functional impacts, and opportunities
Source: PubMed Central journal article supplement — Pain. 2023 Sep 21;165(3):666–73. doi: 10.1097/j.pain.0000000000003056 (PMC10859853; doi:10.1097/j.pain.0000000000003056), 2023-09-21
Supplement: jop-165-666-s001.pdf [file jop-165-666-s001.pdf]

**Supplemental Table 1:** Percentage of U.S. adults with Anxiety Alone, Depression Alone, or Co-Occurring Anxiety and Depression, grouped by Presence of Chronic Pain.

|                                                                                                                                                                                                                                                                                                                                                                                                                               | Anxiety Alone <sup>o</sup> |          |                     |          | Depression Alone <sup>o</sup> |          |        |            | Anxiety and Depression <sup>o</sup> |          |        |            |
|-------------------------------------------------------------------------------------------------------------------------------------------------------------------------------------------------------------------------------------------------------------------------------------------------------------------------------------------------------------------------------------------------------------------------------|----------------------------|----------|---------------------|----------|-------------------------------|----------|--------|------------|-------------------------------------|----------|--------|------------|
|                                                                                                                                                                                                                                                                                                                                                                                                                               | N <sup>§</sup>             | 95% CI   | Pop. % <sup>¶</sup> | 95% CI   | N                             | 95% CI   | Pop. % | 95% CI     | N                                   | 95% CI   | Pop. % | 95% CI     |
| <b>No Chronic Pain</b>                                                                                                                                                                                                                                                                                                                                                                                                        | 2.7                        | 2.3, 3.0 | 1.4%                | 1.2, 1.6 | 2.9                           | 2.6, 3.3 | 1.4%   | 1.2, 1.6   | 4.0                                 | 3.5, 4.4 | 2.0%   | 1.8, 2.3   |
| <b>Chronic Pain</b>                                                                                                                                                                                                                                                                                                                                                                                                           | 1.9                        | 1.6, 2.2 | 3.8%                | 3.2, 4.4 | 3.7                           | 3.3, 4.1 | 7.5%   | 6.6, 8.2   | 6.3                                 | 5.7, 6.8 | 12.6%  | 11.6, 13.6 |
| <i>Lower-Impact CP</i>                                                                                                                                                                                                                                                                                                                                                                                                        | 1.1                        | 0.8, 1.3 | 3.4%                | 2.7, 4.2 | 1.6                           | 1.3, 1.9 | 5.0%   | 4.2, 5.8   | 2.1                                 | 1.8, 2.4 | 6.5%   | 5.6, 7.4   |
| <i>High-Impact CP</i>                                                                                                                                                                                                                                                                                                                                                                                                         | 0.8                        | 0.6, 1.0 | 4.5%                | 3.5, 5.4 | 2.1                           | 1.8, 2.5 | 11.7%  | 10.5, 13.3 | 4.2                                 | 3.8, 4.6 | 23.3%  | 21.3, 25.3 |
| <sup>o</sup> Denotes clinically significant symptoms of anxiety without depression, depression without anxiety, or both anxiety and depression.<br><sup>§</sup> N = national prevalence, reported in millions of U.S adults.<br><sup>¶</sup> Pop. % = national prevalence as a proportion of the U.S. adult general population.<br>Data Source: National Center for Health Statistics, National Health Interview Survey, 2019 |                            |          |                     |          |                               |          |        |            |                                     |          |        |            |

**Supplemental Table 2.** Prevalence of functional impacts among U.S. adults with chronic pain (CP) only, anxiety/depression symptoms (A/D) only, and co-occurring symptoms.

|                                                        | Work limited due to health problems<br>(millions) |               |                     |               | Difficulty doing errands alone<br>(millions) |             |        |               | Difficulty with social participation<br>(millions) |             |        |               |
|--------------------------------------------------------|---------------------------------------------------|---------------|---------------------|---------------|----------------------------------------------|-------------|--------|---------------|----------------------------------------------------|-------------|--------|---------------|
|                                                        | N <sup>§</sup>                                    | 95 CI         | Pop. % <sup>¶</sup> | 95 CI         | N                                            | 95 CI       | Pop. % | 95 CI         | N                                                  | 95 CI       | Pop. % | 95 CI         |
| <b>Neither CP<br/>Nor A/D<sup>°</sup><br/>symptoms</b> | 25.5                                              | 24.1,<br>26.9 | 13.9%               | 13.2,<br>14.5 | 7.1                                          | 6.5,<br>7.7 | 3.9%   | 3.6,<br>4.2   | 7.5                                                | 6.8,<br>8.1 | 4.1%   | 3.7,<br>4.4   |
| <b>CP only</b>                                         | 16.1                                              | 15.2,<br>16.9 | 42.2%               | 40.5,<br>44.0 | 5.5                                          | 5.0,<br>6.0 | 14.4%  | 13.2,<br>15.6 | 6.0                                                | 5.5,<br>6.6 | 15.9%  | 14.6,<br>17.1 |
| <b>A/D<br/>symptoms<br/>only</b>                       | 3.4                                               | 3.0,<br>3.8   | 35.9%               | 32.5,<br>39.2 | 2.2                                          | 1.9,<br>2.6 | 23.4%  | 20.4,<br>26.4 | 3.4                                                | 3.0,<br>3.8 | 35.7%  | 32.1,<br>39.2 |
| <b>Co-<br/>occurring<br/>symptoms</b>                  | 8.3                                               | 7.7,<br>8.9   | 69.4%               | 66.8,<br>72.1 | 5.2                                          | 4.7,<br>5.7 | 43.7%  | 40.7,<br>46.6 | 6.6                                                | 6.1,<br>7.2 | 55.7%  | 52.9,<br>58.6 |

<sup>°</sup>A/D defined as clinically significant symptoms of anxiety, depression, or both.  
<sup>§</sup>N = national prevalence, reported in millions of U.S adults.  
<sup>¶</sup>Pop. % = national prevalence as a proportion of the U.S. adult general population.

Data Source: National Center for Health Statistics, National Health Interview Survey, 2019
